# Supplementary material for: Frontal Brain Activity and Subjective Arousal During Emotional Picture Viewing in Nightmare Sufferers
Source: PubMed Central journal article supplement (PMC7561419; doi:10.3389/fnins.2020.585574), 2020-09-30
Supplement: Table_1.pdf [file Table_1.pdf]

## 1 Supplementary table

|                  | Ch1     | Ch2     | Ch3     | Ch4     | Ch5     | Ch6     | Ch7     | Ch8     |
|------------------|---------|---------|---------|---------|---------|---------|---------|---------|
| x                | 45.33   | 34.00   | 55.33   | 45.00   | -18.33  | -31.67  | -33.33  | -46.33  |
| y                | 58.67   | 64.33   | 40.67   | 47.67   | 70.33   | 55.33   | 66.00   | 50.67   |
| z                | -2.33   | 15.33   | 10.33   | 28.00   | 17.00   | 29.67   | -2.33   | 11.33   |
| Locations in     |         |         |         |         |         |         |         |         |
| Harvard-Oxford   | 14%     | 19%     | 31%     | 6%      | 32%     | 29%     | 27%     | 42%     |
| Cortical         | Frontal | Frontal | Frontal | Frontal | Frontal | Frontal | Frontal | Frontal |
| Structural Atlas | Pole    | Pole    | Pole    | Pole    | Pole    | Pole    | Pole    | Pole    |

**Table S1.** Locations of NIRS channels.
